# Supplementary material for: Insulin receptor substrate-4 interacts with ubiquitin-specific protease 18 to activate the Jak/STAT signaling pathway
Source: PubMed Central journal article supplement (PMC5739690; doi:10.18632/oncotarget.22510), 2017-11-18
Supplement: oncotarget-08-105923-s001.pdf [file oncotarget-08-105923-s001.pdf]

## Insulin receptor substrate-4 interacts with ubiquitin-specific protease 18 to activate the Jak/STAT signaling pathway

### SUPPLEMENTARY MATERIAL

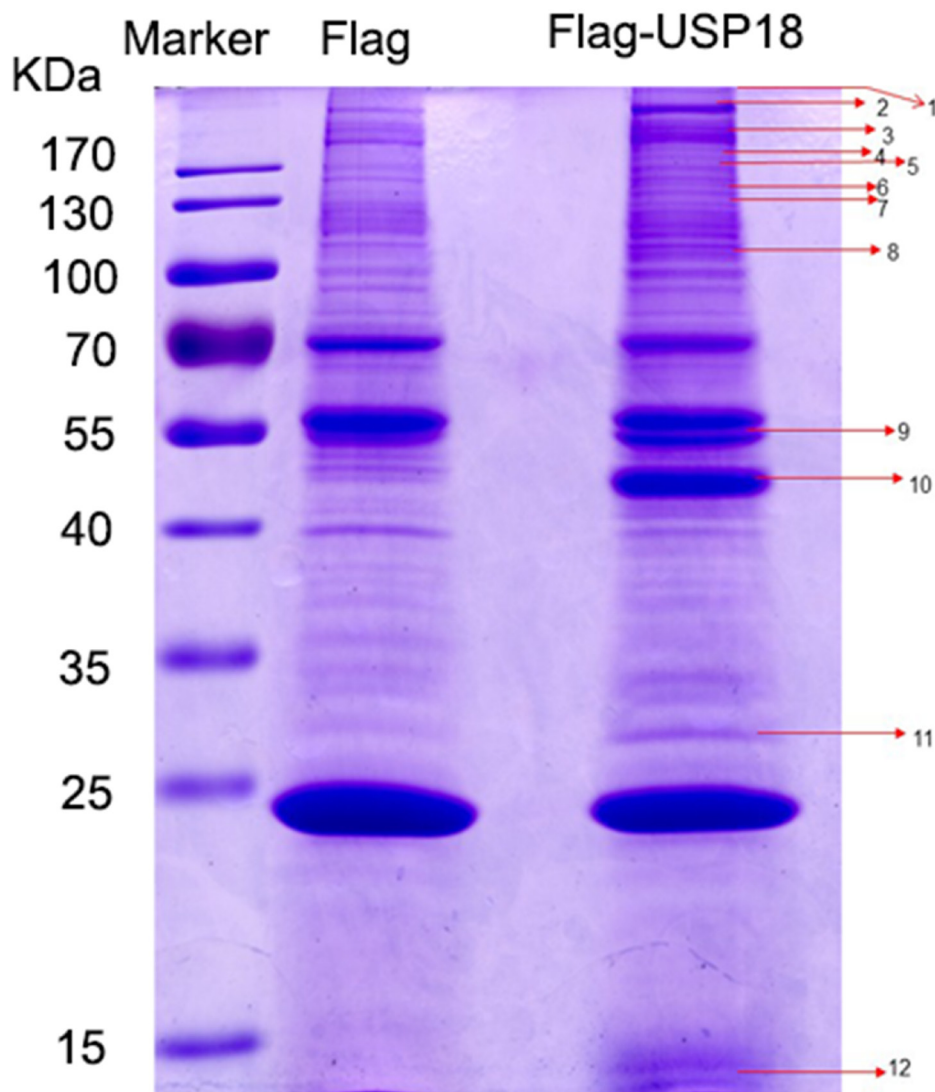

**Supplementary Figure 1: Identification of USP18-binding proteins.** 293T cell lines stably expressing Flag or Flag-USP18 were established. Cell protein lysates were precipitated with anti-Flag M2 affinity gel. The immunoprecipitated protein complexes were separated by SDS-PAGE, stained using Coomassie R-350 and analyzed by mass spectrometric analysis.

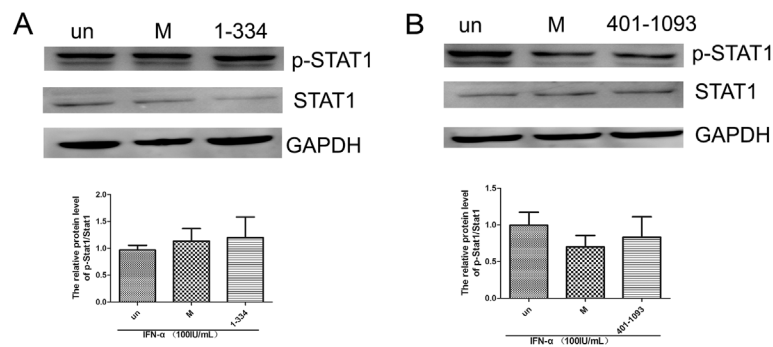

**Supplementary Figure 2: IRS4 mutants (1-334, 401-1093) did not affect IFN- $\alpha$ -induced activation of Jak/STAT signaling pathway.** Huh-7.5.1 cells were transfected with Flag empty vector or IRS4 mutant1-334 (**A**) or 401-1093 (**B**), the cells were treated with 100 IU/mL IFN- $\alpha$  for 30 min at 48 hours after transfection. Protein lysates were harvested, separated by SDS-PAGE, and probed for STAT1-phospho701. Blots were then stripped and probed for total STAT1 expression. The ratio of p-STAT1 to total STAT1 from 3 independent experiments was quantified (bottom).

#### Supplementary Table 1: Identify USP18 interaction protein using immunoprecipitation method

---

E3 ubiquitin protein ligase HUWE1  
 DNA dependent protein kinase catalytic subunit  
 Fatty acid synthase  
 Ubiquitin-40S ribosomal protein S27a  
 Insulin receptor substrate 4  
 ATP-dependent RNA helicase A  
 Elongation factor 2  
 Tubulin beta chain  
 Elongation factor 1-alpha 1  
 Elongation factor 1-alpha 2  
 Histone H2B  
 Histone H4

---

Supplementary Table 2: Real time PCR primer

| Gene name | Primer sequence                                                                 |
|-----------|---------------------------------------------------------------------------------|
| GAPDH     | Forward 5'-GCCTCCTGCACCACCAACTG-3'<br>Reverse 5'-ACGCCTGCTTCACCACCTTC-3'        |
| JFH-1     | Forward 5'-GCAGAAAGCGCCTAGCCAT-3'<br>Reverse 5'-CTCGCAAGCGCCCTATCAG-3'          |
| Mx1       | Forward 5'-GTGCATTGCAGAAGGTCAGA-3'<br>Reverse 5'-CTGGTGATAGGCCATCAGGT-3'        |
| IFIT1     | Forward 5'- TCAGGTCAAGGATAGTCTGGAG-3'<br>Reverse 5'- AGGTTGTGTATTCCCACACTGTA-3' |
| VIPERIN   | Forward 5'-TCTTGAGTGTGTTTCAGGCA-3'<br>Reverse 5'-TCTTCCTCCTCTTTGGTCTC-3'        |
